# Supplementary material
Source: PubMed Central journal article supplement (PMC4053538)
Supplement: NIHMS586266-supplement-1.pdf [file NIHMS586266-supplement-1.pdf]

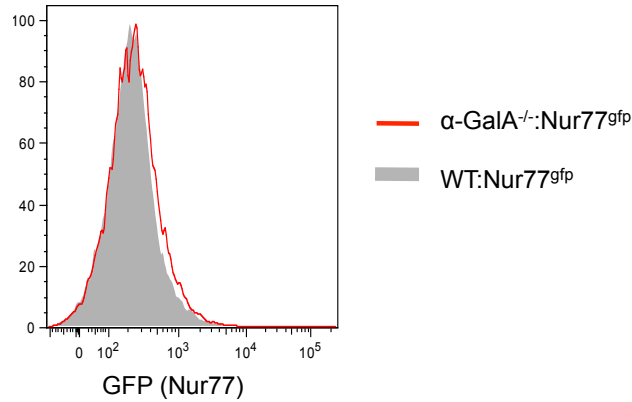

**Fig. S1: iNKT cells were not activated in  $\alpha$ -GalA<sup>-/-</sup>:Nur77<sup>gfp</sup> chimeras.** Tet<sup>+</sup> iNKT cells were isolated from  $\alpha$ -GalA<sup>-/-</sup>:Nur77<sup>gfp</sup> mixed bone marrow chimeras and analyzed by flow cytometry for GFP expression. Histogram shows GFP expression for iNKT cells from a WT:Nur77<sup>gfp</sup> mixed bone marrow chimera (gray) and iNKT cells from  $\alpha$ -GalA<sup>-/-</sup>:Nur77<sup>gfp</sup> mixed bone marrow chimera (red). Data shown is representative of three independent experiments (WT:Nur77<sup>gfp</sup> = 3;  $\alpha$ -GalA<sup>-/-</sup>:Nur77<sup>gfp</sup> = 10).

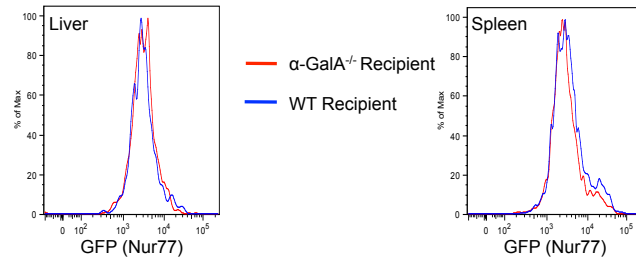

**Fig. S2: iNKT were not activated after transfer into a-Gal A<sup>-/-</sup> mice.** iNKT cells were enriched from congenic (CD45.1) Nur77<sup>gfp</sup> Va14 TCR transgenic B6 mice and transferred into either WT or a-GalA<sup>-/-</sup> recipients. One day later, the transferred cells were recovered with magnetic beads and tet<sup>+</sup> cells analyzed by flow cytometry. Histograms show representative data of hepatic or splenic iNKT cells isolated from a WT recipient (blue) or a-GalA<sup>-/-</sup> recipient (red) from one experiment (WT recipient = 3; a-GalA<sup>-/-</sup> recipient = 3).

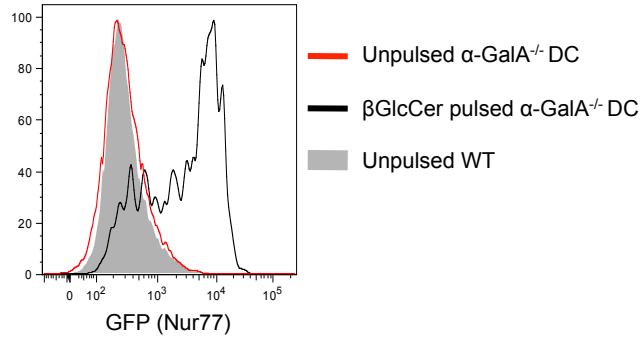

**Fig. S3:  $\alpha$ -Gal A<sup>-/-</sup> BMDCs transferred into Nur77<sup>gfp</sup> mice did not activate iNKT cells.** Unpulsed  $\alpha$ -Gal A<sup>-/-</sup> BMDC,  $\alpha$ -Gal A<sup>-/-</sup> BMDC pulsed with bGlcCer, or unpulsed WT BMDC were transferred into Nur77<sup>gfp</sup> mice, and tet<sup>+</sup> iNKT cells were analyzed by flow cytometry 18 h later. Histogram shows representative GFP expression for iNKT cells from mice that received unpulsed WT BMDC (gray), unpulsed  $\alpha$ -Gal A<sup>-/-</sup> BMDC (red), or  $\alpha$ -Gal A<sup>-/-</sup> BMDC pulsed with bGlcCer (black) from two independent experiments (WT BMDC = 2, unpulsed  $\alpha$ -Gal A<sup>-/-</sup> BMDC = 4,  $\alpha$ -Gal A<sup>-/-</sup> BMDC pulsed with bGlcCer = 2).

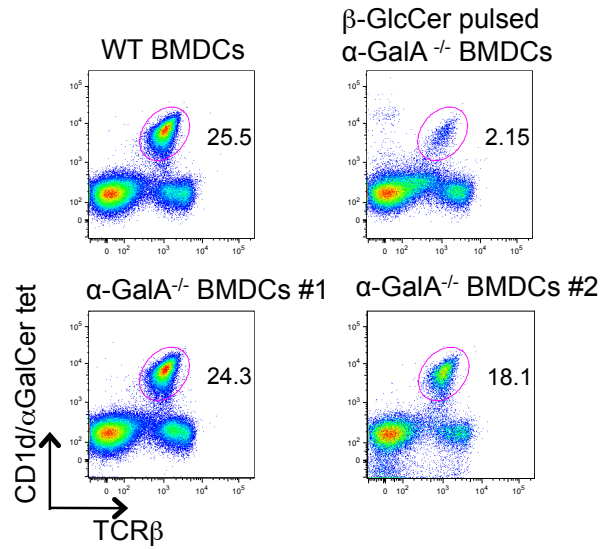

**Fig. S4: Inconsistent TCR internalization in iNKT cells after injection of  $\alpha$ -Gal A<sup>-/-</sup> BMDC.** Unpulsed  $\alpha$ -Gal A<sup>-/-</sup> BMDC,  $\alpha$ -Gal A<sup>-/-</sup> BMDC pulsed with  $\beta$ GlcCer, or WT BMDC were transferred into Nur77<sup>gfp</sup> mice. After 18 h, the tet<sup>+</sup> iNKT cells were gated and showed an inconsistent reduction in proportion compared to WT (presumed to reflect TCR internalization) when injected with  $\alpha$ -Gal A<sup>-/-</sup> BMDC (compare bottom left to bottom right).
